# Supplementary material
Source: publisher figshare collection journal article supplement (https://acs.figshare.com/ndownloader/files/5834859)
Supplement: Supplementary file 1 [file 5834859]

data_C19H18ClNO2 
_audit_creation_date                  'Mon Apr 22 16:56:39 2002'
_audit_creation_method                'by teXsan'
_audit_update_record                   ?
#------------------------------------------------------------------------------
# PROCESSING SUMMARY (IUCr Office Use Only) 
_journal_date_recd_electronic          ?
_journal_date_from_coeditor            ?
_journal_date_accepted                 ?
_journal_coeditor_code                 ?
#------------------------------------------------------------------------------

_publ_contact_author_name           'Dr Tohru Yamada'

_publ_contact_author_address
;
Department of Chemistry
Faculty of Science of Technology
Keio University
Hiyoshi 3-14-1, kohoku-ku
Yokohama 223-8522
Japan
;
_publ_contact_author_email            'yamada@chem.keio.ac.jp'
_publ_contact_author_fax              '(81) 45 566 1716'
_publ_contact_author_phone            '(81) 45 566 1716'

#--------------------------------------------------------------------
#              Data items nedded for deposition
#--------------------------------------------------------------------

_publ_contact_letter
;
This CIF is aimed for Cambridge Structural Database.
The original paper has been submitted.

Journal:  Organic Letters

Title:The Enantioselective 1,3-Dipolar Cycloaddition Reaction of Nitrones
Catalyzd by Optically Active Cationic Cobalt(III) Complexes

Authors: Tsuyoshi Mita, Natsuki Ohtsuki, Taketo Ikeno, and Tohru Yamada

;

#  TITLE

_publ_section_title
;
Supplementary Information of X-ray Crystal Structure Analysis of
(1S,4S,5S)-4-(2',3',5'-trichlorophenyl)-5-hydroxymethyl-3-phenyl-2-oxa-3-azabicyclo[3.3.0]octane  
;

loop_
_publ_author_name
_publ_author_address
'Tsuyoshi Mita'
;
Department of Chemistry
Faculty of Science and Technology
Keio University
Hiyoshi 3-14-1, Kohoku-ku
Yokohama 223-8522
Japan
;

'Natsuki Ohtsuki'
;
Department of Chemistry
Faculty of Science and Technology
Keio University
Hiyoshi 3-14-1, Kohoku-ku
Yokohama 223-8522
Japan
;

'Taketo Ikeno'
;
Department of Chemistry
Faculty of Science and Technology
Keio University
Hiyoshi 3-14-1, Kohoku-ku
Yokohama 223-8522
Japan
;

'Tohru Yamada'
;
Department of Chemistry
Faculty of Science and Technology
Keio University
Hiyoshi 3-14-1, Kohoku-ku
Yokohama 223-8522
Japan
;

_publ_section_exptl_prep
;
The title optically active compound was prepared for determination 
of the absolute configuration of the 1,3-dipolar adduct.
The angle of rotation is [\a]~D~ -71.962 \% (c 0.650, CHCl~3~)
The crystals were grown from a ethanol solution.
;

_publ_section_exptl_refinement
;
X-ray intensities were measured for +h, +k, +l (\q  < 27.5 \%) reflections.
The hydroxy H atom was located from difference synthesis.
The other H-atom positional parameters were calculated geometrically
and fixed with U~iso~(H) = 1.2U~eq~(parent atom).] 
The absolute structure was determined based on Flack parameter
of -0.10(7).
;

_publ_section_references
;
Altomare, A., Cascarano, G., Giacovazzo, C., Guagliardi, A.,
Burla, M. C., Polidori, G. & Camalli, M. (1994).
J. Appl. Cryst. 27, 435.

Beurskens, P. T., Admiraal, G., Beurskens, G., Bosman, W. P.,
de Gelder, R., Israel, R. & Smits, J. M. M. (1994).
The DIRDIF-94 program system. Technical Report of the Crystallography
Laboratory, University of Nijmegen, The Netherlands.

Flack, H. D. (1983). Acta. Cryst. A39, 876-881.

International Tables for X-ray Crystallography, Vol. II.
Birmingham: Kynoch Press., Tables 5.3.6B, 302-305.

Johnson, C. K. (1976). ORTEP-II. A Fortran Thermal-Ellipsoid Plot
Program. Report ORNL-5138. Oak Ridge National Laboratory, Oak Ridge,
Tennessee, USA.

Molecular Structure Corporation. (1998). 
MSC/AFC Diffractometer Control Software.
MSC, 3200 Research Forest Drive, The Woodlands, TX 77381, USA.

Molecular Structure Corporation. (1999). TEXSAN. 
Single Crystal Structure Analysis Software. Version 1.10.
MSC, 3200 Research Forest Drive, The Woodlands, TX 77381, USA.

North, A. C. T., Phillips, D. C. & Mathews, F. S. (1968).
Acta Cryst. A24, 351-359.

Rigaku Corporation (1999). WinAFC Diffractometer Control Software.
3-9-12 Matsubara Akishima, Tokyo 196-8666, Japan.

Sheldrick, G. M. (1997). SHELXL97. Program for the Refinement of
Crystal Structures. University of G\"ottingen, Germany.
;

#------------------------------------------------------------------------------
data_(I)
#------------------------------------------------------------------------------
# CHEMICAL DATA 
_chemical_formula_sum                  'C19 H18 Cl3 N O2 '
_chemical_formula_moiety               'C19 H18 Cl3 N O2 '
_chemical_formula_weight               398.72
_chemical_melting_point                186
_chemical_absolute_configuration
;(1S,4S,5S)-4-(2',3',5'-trichlorophenyl)-5-hydroxymethyl-3-phenyl-2-oxa-3-azabicyclo[3.3.0]octane
;
#------------------------------------------------------------------------------
# CRYSTAL DATA 
_symmetry_cell_setting                 orthorhombic
_symmetry_space_group_name_H-M        'P 21 21 21   '
_symmetry_Int_Tables_number            19
_symmetry_space_group_name_Hall          'P 2ac 2ab '
loop_
_symmetry_equiv_pos_as_xyz
x,y,z
1/2-x,-y,1/2+z
1/2+x,1/2-y,-z
-x,1/2+y,1/2-z
_cell_length_a                         12.360(4)
_cell_length_b                         13.93(1)
_cell_length_c                         10.496(8)
_cell_angle_alpha                      90
_cell_angle_beta                       90
_cell_angle_gamma                      90
_cell_volume                           1807(2)
_cell_formula_units_Z                  4
_cell_measurement_reflns_used          25
_cell_measurement_theta_min            10.0
_cell_measurement_theta_max            11.9
_cell_measurement_temperature          298(1)
#------------------------------------------------------------------------------
_exptl_crystal_description            'prism'
_exptl_crystal_colour                 'colourless'
_exptl_crystal_size_max                0.68
_exptl_crystal_size_mid                0.50
_exptl_crystal_size_min                0.40
_exptl_crystal_size_rad                ?
_exptl_crystal_density_diffrn          1.465
_exptl_crystal_density_meas            ?
_exptl_crystal_density_method         'not measured'
_exptl_crystal_F_000                   824
_exptl_absorpt_coefficient_mu          0.519
_exptl_absorpt_correction_type         psi-scan
_exptl_absorpt_process_details        '(North et al., 1968)'
_exptl_absorpt_correction_T_min        0.739
_exptl_absorpt_correction_T_max        0.813
#------------------------------------------------------------------------------
# EXPERIMENTAL DATA 
_diffrn_radiation_type                'Mo K\a'
_diffrn_radiation_wavelength           0.71073
_diffrn_measurement_device_type       'Rigaku AFC7R'
_diffrn_measurement_method             \w-2\q
_diffrn_reflns_number                  2992
_diffrn_reflns_av_R_equivalents        0.049
_diffrn_reflns_theta_min               2.5
_diffrn_reflns_theta_max               27.50
_diffrn_reflns_theta_full              27.50
_diffrn_measured_fraction_theta_max    1.0
_diffrn_measured_fraction_theta_full   1.0
_diffrn_reflns_limit_h_min             0
_diffrn_reflns_limit_h_max             16
_diffrn_reflns_limit_k_min             0
_diffrn_reflns_limit_k_max             18
_diffrn_reflns_limit_l_min             0
_diffrn_reflns_limit_l_max             13
_diffrn_standards_number               3
_diffrn_standards_interval_count       150
_diffrn_standards_decay_%              1.35
#------------------------------------------------------------------------------
# REFINEMENT DATA 
_refine_special_details
;
Refinement using reflections with F^2^ > 0.0 sigma(F^2^). The weighted R-factor
(wR), goodness of fit (S) and R-factor (gt) are based on F, with F set to zero 
for negative F. The threshold expression of F^2^ > 2.0 sigma(F^2^) is used only 
for calculating R-factor (gt).
;
_reflns_number_total                   2509
_reflns_number_gt                      2299
_reflns_threshold_expression           'I>2\s(I)'
_refine_ls_structure_factor_coef       Fsqd
_refine_ls_R_factor_gt                 0.032
_refine_ls_wR_factor_ref               0.085
_refine_ls_hydrogen_treatment          'H atoms: see text'
_refine_ls_number_reflns               2509
_refine_ls_number_parameters           230
_refine_ls_goodness_of_fit_ref         1.030
_refine_ls_weighting_scheme            calc
_refine_ls_weighting_details               
   'w = 1/[\s^2^(Fo^2^) + (0.0472P)^2^+0.3892P] where P=(Fo^2^+2Fc^2^)/3'
_refine_ls_shift/su_max                0.001
_refine_ls_extinction_method           none
_refine_ls_abs_structure_details       'Flack(1983)'
_refine_ls_abs_structure_Flack         -0.10(7)
_refine_diff_density_max               0.23
_refine_diff_density_min               -0.22
loop_
_atom_type_symbol
_atom_type_description
_atom_type_scat_dispersion_real
_atom_type_scat_dispersion_imag
_atom_type_scat_source
  'C' 'C'  0.003 0.002 
;International Tables for Crystallography
(1992, Vol. C, Tables 4.2.6.8 and 6.1.1.4)
;
  'H' 'H'  0.000 0.000 
;International Tables for Crystallography
(1992, Vol. C, Table 6.1.1.4)
;
  'N' 'N'  0.006 0.003 
;International Tables for Crystallography
(1992, Vol. C, Tables 4.2.6.8 and 6.1.1.4)
;
  'O' 'O'  0.011 0.006 
;International Tables for Crystallography
(1992, Vol. C, Tables 4.2.6.8 and 6.1.1.4)
;
  'Cl' 'Cl'  0.148 0.159 
;International Tables for Crystallography
(1992, Vol. C, Tables 4.2.6.8 and 6.1.1.4)
;
#------------------------------------------------------------------------------
# ATOMIC COORDINATES AND DISPLACEMENT PARAMETERS 
loop_
_atom_site_label
_atom_site_type_symbol
_atom_site_fract_x
_atom_site_fract_y
_atom_site_fract_z
_atom_site_U_iso_or_equiv
_atom_site_adp_type
_atom_site_occupancy
_atom_site_calc_flag
_atom_site_refinement_flags
_atom_site_disorder_assembly
_atom_site_disorder_group
 Cl(1)  Cl -0.49690(6) -0.16046(5) -0.54193(6) 0.0512(2)   Uani 1.00 d . . .
 Cl(2)  Cl -0.38598(7) -0.29860(6) -0.34681(6) 0.0555(2)   Uani 1.00 d . . .
 Cl(3)  Cl -0.15506(6) -0.45710(5) -0.72485(9) 0.0589(2)   Uani 1.00 d . . .
 O(4)   O  -0.4023(1)  -0.2474(1)  -1.0188(2)  0.0362(4)   Uani 1.00 d . . .
 O(5)   O  -0.7114(2)  -0.1338(2)  -0.9491(2)  0.0563(5)   Uani 1.00 d . . .
 N(6)   N  -0.3620(1)  -0.1741(1)  -0.9359(2)  0.0326(4)   Uani 1.00 d . . .
 C(7)   C  -0.3790(2)  -0.2501(2)  -0.7248(2)  0.0311(4)   Uani 1.00 d . . .
 C(8)   C  -0.4050(2)  -0.2449(2)  -0.5950(2)  0.0337(5)   Uani 1.00 d . . .
 C(9)   C  -0.3558(2)  -0.3065(2)  -0.5082(2)  0.0380(5)   Uani 1.00 d . . .
 C(10)  C  -0.2805(2)  -0.3733(2)  -0.5464(3)  0.0414(5)   Uani 1.00 d . . .
 C(11)  C  -0.2537(2)  -0.3769(2)  -0.6742(3)  0.0386(5)   Uani 1.00 d . . .
 C(12)  C  -0.3012(2)  -0.3171(2)  -0.7630(2)  0.0356(5)   Uani 1.00 d . . .
 C(13)  C  -0.4302(2)  -0.1825(2)  -0.8209(2)  0.0305(4)   Uani 1.00 d . . .
 C(14)  C  -0.5450(2)  -0.2127(2)  -0.8729(2)  0.0339(5)   Uani 1.00 d . . .
 C(15)  C  -0.6191(2)  -0.1242(2)  -0.8689(3)  0.0440(5)   Uani 1.00 d . . .
 C(16)  C  -0.5965(2)  -0.3022(2)  -0.8125(3)  0.0460(6)   Uani 1.00 d . . .
 C(17)  C  -0.5626(3)  -0.3868(2)  -0.8956(4)  0.0579(8)   Uani 1.00 d . . .
 C(18)  C  -0.5619(2)  -0.3451(2)  -1.0295(3)  0.0541(7)   Uani 1.00 d . . .
 C(19)  C  -0.5200(2)  -0.2434(2)  -1.0114(2)  0.0370(5)   Uani 1.00 d . . .
 C(20)  C  -0.3593(2)  -0.0825(2)  -0.9972(2)  0.0345(5)   Uani 1.00 d . . .
 C(21)  C  -0.3299(2)  -0.0023(2)  -0.9276(3)  0.0487(6)   Uani 1.00 d . . .
 C(22)  C  -0.3201(3)  0.0862(2)   -0.9885(4)  0.0637(9)   Uani 1.00 d . . .
 C(23)  C  -0.3410(3)  0.0947(2)   -1.1156(4)  0.0651(9)   Uani 1.00 d . . .
 C(24)  C  -0.3691(3)  0.0159(3)   -1.1854(3)  0.0595(8)   Uani 1.00 d . . .
 C(25)  C  -0.3774(2)  -0.0737(2)  -1.1270(2)  0.0441(6)   Uani 1.00 d . . .
 H(5)   H  -0.763(5)   -0.178(4)   -0.909(7)   0.1746(4)   Uiso 1.00 d . . .
 H(10)  H  -0.2477     -0.4152     -0.4864     0.0498      Uiso 1.00 calc . . .
 H(12)  H  -0.2807     -0.3213     -0.8505     0.0428      Uiso 1.00 calc . . .
 H(13)  H  -0.4365     -0.1207     -0.7821     0.0368      Uiso 1.00 calc . . .
 H(15A) H  -0.6423     -0.1134     -0.7840     0.0538      Uiso 1.00 calc . . .
 H(15B) H  -0.5790     -0.0692     -0.8973     0.0538      Uiso 1.00 calc . . .
 H(16A) H  -0.6729     -0.2973     -0.8113     0.0541      Uiso 1.00 calc . . .
 H(16B) H  -0.5703     -0.3113     -0.7282     0.0541      Uiso 1.00 calc . . .
 H(17A) H  -0.6134     -0.4385     -0.8885     0.0693      Uiso 1.00 calc . . .
 H(17B) H  -0.4929     -0.4099     -0.8722     0.0693      Uiso 1.00 calc . . .
 H(18A) H  -0.5148     -0.3814     -1.0852     0.0638      Uiso 1.00 calc . . .
 H(18B) H  -0.6327     -0.3459     -1.0669     0.0638      Uiso 1.00 calc . . .
 H(19)  H  -0.5497     -0.1992     -1.0721     0.0445      Uiso 1.00 calc . . .
 H(21)  H  -0.3144     -0.0074     -0.8377     0.0578      Uiso 1.00 calc . . .
 H(22)  H  -0.2996     0.1423      -0.9419     0.0758      Uiso 1.00 calc . . .
 H(23)  H  -0.3366     0.1556      -1.1569     0.0795      Uiso 1.00 calc . . .
 H(24)  H  -0.3816     0.0216      -1.2757     0.0697      Uiso 1.00 calc . . .
 H(25)  H  -0.3960     -0.1289     -1.1762     0.0520      Uiso 1.00 calc . . .

loop_
_atom_site_aniso_label
_atom_site_aniso_U_11
_atom_site_aniso_U_22
_atom_site_aniso_U_33
_atom_site_aniso_U_12
_atom_site_aniso_U_13
_atom_site_aniso_U_23
 Cl(1)  0.0571(4)   0.0548(4)   0.0416(3)   0.0174(3)   0.0088(3)   -0.0038(3) 
 Cl(2)  0.0692(4)   0.0657(4)   0.0317(3)   0.0020(4)   0.0002(3)   0.0050(3)  
 Cl(3)  0.0541(4)   0.0514(4)   0.0713(5)   0.0218(3)   0.0096(4)   0.0068(4)  
 O(4)   0.0318(8)   0.0378(8)   0.0390(9)   0.0009(6)   0.0025(7)   -0.0079(7) 
 O(5)   0.0367(9)   0.072(1)    0.060(1)    0.0045(9)   -0.0110(9)  -0.006(1)  
 N(6)   0.0302(8)   0.0354(9)   0.0322(9)   0.0005(7)   0.0005(8)   0.0006(8)  
 C(7)   0.0288(9)   0.0318(9)   0.0328(10)  -0.0033(8)  0.0001(8)   -0.0016(8) 
 C(8)   0.032(1)    0.0328(10)  0.036(1)    0.0001(9)   -0.0006(9)  -0.0017(9) 
 C(9)   0.041(1)    0.041(1)    0.0315(10)  -0.005(1)   -0.0009(9)  0.0021(10) 
 C(10)  0.041(1)    0.040(1)    0.043(1)    -0.0008(10) -0.006(1)   0.008(1)   
 C(11)  0.032(1)    0.034(1)    0.050(1)    0.0033(9)   0.000(1)    0.000(1)   
 C(12)  0.034(1)    0.036(1)    0.037(1)    -0.0002(9)  0.0023(9)   -0.0005(9) 
 C(13)  0.0280(9)   0.0320(10)  0.0314(10)  0.0003(8)   0.0021(8)   -0.0005(8) 
 C(14)  0.0281(10)  0.038(1)    0.035(1)    -0.0012(9)  -0.0004(8)  -0.0015(9) 
 C(15)  0.033(1)    0.053(1)    0.047(1)    0.008(1)    -0.006(1)   -0.010(1)  
 C(16)  0.038(1)    0.050(1)    0.050(1)    -0.013(1)   -0.001(1)   0.005(1)   
 C(17)  0.049(1)    0.040(1)    0.084(2)    -0.012(1)   -0.009(2)   0.000(1)   
 C(18)  0.043(1)    0.054(2)    0.065(2)    -0.010(1)   -0.001(1)   -0.024(1)  
 C(19)  0.029(1)    0.046(1)    0.037(1)    -0.0010(9)  -0.0013(9)  -0.0048(10)
 C(20)  0.0263(9)   0.038(1)    0.039(1)    0.0010(9)   0.0052(9)   0.0040(10) 
 C(21)  0.051(1)    0.049(1)    0.047(1)    -0.014(1)   0.008(1)    -0.001(1)  
 C(22)  0.069(2)    0.043(1)    0.079(2)    -0.017(1)   0.025(2)    0.000(2)   
 C(23)  0.060(2)    0.049(2)    0.087(3)    -0.001(1)   0.020(2)    0.025(2)   
 C(24)  0.054(2)    0.070(2)    0.055(2)    0.002(1)    0.002(1)    0.028(1)   
 C(25)  0.040(1)    0.053(1)    0.040(1)    -0.001(1)   0.001(1)    0.007(1)   
#------------------------------------------------------------------------------
_computing_data_collection            'WinAFC'
_computing_cell_refinement            'WinAFC'
_computing_data_reduction             'teXsan Ver. 1.11'
_computing_structure_solution          SIR92
_computing_structure_refinement       'SHELXL97'
_computing_publication_material       'teXsan Ver. 1.11'
_computing_molecular_graphics          ?
#------------------------------------------------------------------------------
_geom_special_details
;
 ?
;
loop_
_geom_bond_atom_site_label_1
_geom_bond_atom_site_label_2
_geom_bond_distance
_geom_bond_site_symmetry_1
_geom_bond_site_symmetry_2
_geom_bond_publ_flag
 Cl(1)     C(8)      1.727(2)   . . yes
 Cl(2)     C(9)      1.738(2)   . . yes
 Cl(3)     C(11)     1.737(3)   . . yes
 O(4)      N(6)      1.431(3)   . . yes
 O(4)      C(19)     1.458(3)   . . yes
 O(5)      C(15)     1.423(3)   . . yes
 O(5)      H(5)      0.98(6)    . . no
 N(6)      C(13)     1.477(3)   . . yes
 N(6)      C(20)     1.429(3)   . . yes
 C(7)      C(8)      1.402(3)   . . yes
 C(7)      C(12)     1.400(3)   . . yes
 C(7)      C(13)     1.517(3)   . . yes
 C(8)      C(9)      1.392(3)   . . yes
 C(9)      C(10)     1.376(4)   . . yes
 C(10)     C(11)     1.383(4)   . . yes
 C(10)     H(10)     0.949      . . no
 C(11)     C(12)     1.380(3)   . . yes
 C(12)     H(12)     0.955      . . no
 C(13)     C(14)     1.578(3)   . . yes
 C(13)     H(13)     0.956      . . no
 C(14)     C(15)     1.536(4)   . . yes
 C(14)     C(16)     1.537(4)   . . yes
 C(14)     C(19)     1.547(3)   . . yes
 C(15)     H(15A)    0.949      . . no
 C(15)     H(15B)    0.961      . . no
 C(16)     C(17)     1.525(4)   . . yes
 C(16)     H(16A)    0.947      . . no
 C(16)     H(16B)    0.950      . . no
 C(17)     C(18)     1.520(5)   . . yes
 C(17)     H(17A)    0.959      . . no
 C(17)     H(17B)    0.952      . . no
 C(18)     C(19)     1.520(4)   . . yes
 C(18)     H(18A)    0.968      . . no
 C(18)     H(18B)    0.959      . . no
 C(19)     H(19)     0.959      . . no
 C(20)     C(21)     1.383(4)   . . yes
 C(20)     C(25)     1.386(4)   . . yes
 C(21)     C(22)     1.393(4)   . . yes
 C(21)     H(21)     0.966      . . no
 C(22)     C(23)     1.364(6)   . . yes
 C(22)     H(22)     0.957      . . no
 C(23)     C(24)     1.365(5)   . . yes
 C(23)     H(23)     0.953      . . no
 C(24)     C(25)     1.394(4)   . . yes
 C(24)     H(24)     0.963      . . no
 C(25)     H(25)     0.955      . . no
#------------------------------------------------------------------------------
loop_
_geom_angle_atom_site_label_1
_geom_angle_atom_site_label_2
_geom_angle_atom_site_label_3
_geom_angle
_geom_angle_site_symmetry_1
_geom_angle_site_symmetry_2
_geom_angle_site_symmetry_3
_geom_angle_publ_flag
   N(6)      O(4)      C(19)     106.7(2)   . . . yes
   C(15)     O(5)      H(5)      109(4)     . . . no
   O(4)      N(6)      C(13)     104.0(2)   . . . yes
   O(4)      N(6)      C(20)     111.8(2)   . . . yes
   C(13)     N(6)      C(20)     116.9(2)   . . . yes
   C(8)      C(7)      C(12)     118.0(2)   . . . yes
   C(8)      C(7)      C(13)     121.2(2)   . . . yes
   C(12)     C(7)      C(13)     120.7(2)   . . . yes
   Cl(1)     C(8)      C(7)      120.0(2)   . . . yes
   Cl(1)     C(8)      C(9)      119.8(2)   . . . yes
   C(7)      C(8)      C(9)      120.3(2)   . . . yes
   Cl(2)     C(9)      C(8)      120.3(2)   . . . yes
   Cl(2)     C(9)      C(10)     118.1(2)   . . . yes
   C(8)      C(9)      C(10)     121.5(2)   . . . yes
   C(9)      C(10)     C(11)     117.9(2)   . . . yes
   C(9)      C(10)     H(10)     120.8      . . . no
   C(11)     C(10)     H(10)     121.3      . . . no
   Cl(3)     C(11)     C(10)     119.2(2)   . . . yes
   Cl(3)     C(11)     C(12)     118.7(2)   . . . yes
   C(10)     C(11)     C(12)     122.1(2)   . . . yes
   C(7)      C(12)     C(11)     120.1(2)   . . . yes
   C(7)      C(12)     H(12)     119.9      . . . no
   C(11)     C(12)     H(12)     120.0      . . . no
   N(6)      C(13)     C(7)      110.8(2)   . . . yes
   N(6)      C(13)     C(14)     104.6(2)   . . . yes
   N(6)      C(13)     H(13)     108.8      . . . no
   C(7)      C(13)     C(14)     116.1(2)   . . . yes
   C(7)      C(13)     H(13)     108.0      . . . no
   C(14)     C(13)     H(13)     108.3      . . . no
   C(13)     C(14)     C(15)     108.2(2)   . . . yes
   C(13)     C(14)     C(16)     116.5(2)   . . . yes
   C(13)     C(14)     C(19)     102.6(2)   . . . yes
   C(15)     C(14)     C(16)     113.1(2)   . . . yes
   C(15)     C(14)     C(19)     111.5(2)   . . . yes
   C(16)     C(14)     C(19)     104.3(2)   . . . yes
   O(5)      C(15)     C(14)     112.7(2)   . . . yes
   O(5)      C(15)     H(15A)    109.2      . . . no
   O(5)      C(15)     H(15B)    107.8      . . . no
   C(14)     C(15)     H(15A)    109.5      . . . no
   C(14)     C(15)     H(15B)    108.9      . . . no
   H(15A)    C(15)     H(15B)    108.7      . . . no
   C(14)     C(16)     C(17)     106.0(2)   . . . yes
   C(14)     C(16)     H(16A)    111.0      . . . no
   C(14)     C(16)     H(16B)    110.6      . . . no
   C(17)     C(16)     H(16A)    109.8      . . . no
   C(17)     C(16)     H(16B)    109.6      . . . no
   H(16A)    C(16)     H(16B)    109.7      . . . no
   C(16)     C(17)     C(18)     103.6(2)   . . . yes
   C(16)     C(17)     H(17A)    110.8      . . . no
   C(16)     C(17)     H(17B)    111.2      . . . no
   C(18)     C(17)     H(17A)    111.3      . . . no
   C(18)     C(17)     H(17B)    111.3      . . . no
   H(17A)    C(17)     H(17B)    108.5      . . . no
   C(17)     C(18)     C(19)     104.0(2)   . . . yes
   C(17)     C(18)     H(18A)    111.2      . . . no
   C(17)     C(18)     H(18B)    111.6      . . . no
   C(19)     C(18)     H(18A)    110.9      . . . no
   C(19)     C(18)     H(18B)    111.9      . . . no
   H(18A)    C(18)     H(18B)    107.2      . . . no
   O(4)      C(19)     C(14)     105.1(2)   . . . yes
   O(4)      C(19)     C(18)     107.4(2)   . . . yes
   O(4)      C(19)     H(19)     111.7      . . . no
   C(14)     C(19)     C(18)     107.9(2)   . . . yes
   C(14)     C(19)     H(19)     111.7      . . . no
   C(18)     C(19)     H(19)     112.6      . . . no
   N(6)      C(20)     C(21)     119.3(2)   . . . yes
   N(6)      C(20)     C(25)     121.2(2)   . . . yes
   C(21)     C(20)     C(25)     119.3(2)   . . . yes
   C(20)     C(21)     C(22)     119.7(3)   . . . yes
   C(20)     C(21)     H(21)     120.6      . . . no
   C(22)     C(21)     H(21)     119.7      . . . no
   C(21)     C(22)     C(23)     120.6(3)   . . . yes
   C(21)     C(22)     H(22)     120.8      . . . no
   C(23)     C(22)     H(22)     118.6      . . . no
   C(22)     C(23)     C(24)     120.2(3)   . . . yes
   C(22)     C(23)     H(23)     120.8      . . . no
   C(24)     C(23)     H(23)     119.0      . . . no
   C(23)     C(24)     C(25)     120.2(3)   . . . yes
   C(23)     C(24)     H(24)     120.2      . . . no
   C(25)     C(24)     H(24)     119.6      . . . no
   C(20)     C(25)     C(24)     120.0(3)   . . . yes
   C(20)     C(25)     H(25)     119.9      . . . no
   C(24)     C(25)     H(25)     120.1      . . . no
#------------------------------------------------------------------------------
loop_
_geom_torsion_atom_site_label_1
_geom_torsion_atom_site_label_2
_geom_torsion_atom_site_label_3
_geom_torsion_atom_site_label_4
_geom_torsion
_geom_torsion_site_symmetry_1
_geom_torsion_site_symmetry_2
_geom_torsion_site_symmetry_3
_geom_torsion_site_symmetry_4
_geom_torsion_publ_flag
 Cl(1)     C(8)      C(7)      C(12)     177.7(2)   . . . . yes
 Cl(1)     C(8)      C(7)      C(13)     0.0(3)     . . . . yes
 Cl(1)     C(8)      C(9)      Cl(2)     -0.3(3)    . . . . yes
 Cl(1)     C(8)      C(9)      C(10)     -178.5(2)  . . . . yes
 Cl(2)     C(9)      C(8)      C(7)      178.7(2)   . . . . yes
 Cl(2)     C(9)      C(10)     C(11)     -177.6(2)  . . . . yes
 Cl(3)     C(11)     C(10)     C(9)      177.5(2)   . . . . yes
 Cl(3)     C(11)     C(12)     C(7)      -178.4(2)  . . . . yes
 O(4)      N(6)      C(13)     C(7)      91.3(2)    . . . . yes
 O(4)      N(6)      C(13)     C(14)     -34.4(2)   . . . . yes
 O(4)      N(6)      C(20)     C(21)     175.4(2)   . . . . yes
 O(4)      N(6)      C(20)     C(25)     -9.8(3)    . . . . yes
 O(4)      C(19)     C(14)     C(13)     10.6(2)    . . . . yes
 O(4)      C(19)     C(14)     C(15)     126.2(2)   . . . . yes
 O(4)      C(19)     C(14)     C(16)     -111.3(2)  . . . . yes
 O(4)      C(19)     C(18)     C(17)     88.0(2)    . . . . yes
 O(5)      C(15)     C(14)     C(13)     161.2(2)   . . . . yes
 O(5)      C(15)     C(14)     C(16)     -68.2(3)   . . . . yes
 O(5)      C(15)     C(14)     C(19)     49.0(3)    . . . . yes
 N(6)      O(4)      C(19)     C(14)     -33.1(2)   . . . . yes
 N(6)      O(4)      C(19)     C(18)     -147.8(2)  . . . . yes
 N(6)      C(13)     C(7)      C(8)      157.3(2)   . . . . yes
 N(6)      C(13)     C(7)      C(12)     -20.3(3)   . . . . yes
 N(6)      C(13)     C(14)     C(15)     -103.8(2)  . . . . yes
 N(6)      C(13)     C(14)     C(16)     127.4(2)   . . . . yes
 N(6)      C(13)     C(14)     C(19)     14.2(2)    . . . . yes
 N(6)      C(20)     C(21)     C(22)     175.8(3)   . . . . yes
 N(6)      C(20)     C(25)     C(24)     -176.8(2)  . . . . yes
 C(7)      C(8)      C(9)      C(10)     0.5(4)     . . . . yes
 C(7)      C(12)     C(11)     C(10)     0.1(4)     . . . . yes
 C(7)      C(13)     N(6)      C(20)     -145.0(2)  . . . . yes
 C(7)      C(13)     C(14)     C(15)     133.8(2)   . . . . yes
 C(7)      C(13)     C(14)     C(16)     5.1(3)     . . . . yes
 C(7)      C(13)     C(14)     C(19)     -108.1(2)  . . . . yes
 C(8)      C(7)      C(12)     C(11)     1.1(3)     . . . . yes
 C(8)      C(7)      C(13)     C(14)     -83.7(3)   . . . . yes
 C(8)      C(9)      C(10)     C(11)     0.7(4)     . . . . yes
 C(9)      C(8)      C(7)      C(12)     -1.3(3)    . . . . yes
 C(9)      C(8)      C(7)      C(13)     -179.0(2)  . . . . yes
 C(9)      C(10)     C(11)     C(12)     -1.0(4)    . . . . yes
 C(11)     C(12)     C(7)      C(13)     178.7(2)   . . . . yes
 C(12)     C(7)      C(13)     C(14)     98.7(2)    . . . . yes
 C(13)     N(6)      O(4)      C(19)     43.0(2)    . . . . yes
 C(13)     N(6)      C(20)     C(21)     55.7(3)    . . . . yes
 C(13)     N(6)      C(20)     C(25)     -129.4(2)  . . . . yes
 C(13)     C(14)     C(16)     C(17)     -92.3(3)   . . . . yes
 C(13)     C(14)     C(19)     C(18)     124.9(2)   . . . . yes
 C(14)     C(13)     N(6)      C(20)     89.3(2)    . . . . yes
 C(14)     C(16)     C(17)     C(18)     -35.7(3)   . . . . yes
 C(14)     C(19)     C(18)     C(17)     -24.8(3)   . . . . yes
 C(15)     C(14)     C(16)     C(17)     141.4(2)   . . . . yes
 C(15)     C(14)     C(19)     C(18)     -119.4(2)  . . . . yes
 C(16)     C(14)     C(19)     C(18)     3.0(2)     . . . . yes
 C(16)     C(17)     C(18)     C(19)     36.8(3)    . . . . yes
 C(17)     C(16)     C(14)     C(19)     20.0(3)    . . . . yes
 C(19)     O(4)      N(6)      C(20)     -84.0(2)   . . . . yes
 C(20)     C(21)     C(22)     C(23)     1.0(5)     . . . . yes
 C(20)     C(25)     C(24)     C(23)     1.4(4)     . . . . yes
 C(21)     C(20)     C(25)     C(24)     -2.0(4)    . . . . yes
 C(21)     C(22)     C(23)     C(24)     -1.7(5)    . . . . yes
 C(22)     C(21)     C(20)     C(25)     0.9(4)     . . . . yes
 C(22)     C(23)     C(24)     C(25)     0.5(5)     . . . . yes
 C(22)     C(23)     C(24)     C(25)     0.5(5)     . . . . yes
#-----------------------------------------------------------------------------
#------------------------------------------------------------------------------
